# Supplementary material for: Design of ternary TiO2 -based nanocomposite for enhanced photocatalysis of MNZ: application to pharmaceutical wastewater treatment
Source: Research Square preprint supplement (doi:10.21203/rs.3.rs-6863269/v1), 2025-08-14
Supplement: Supplementary file 1 [file efe1e39c6d07a6b0ce569b7a.docx]

**Supporting information for**

**Design of ternary TiO2-based nanocomposite for enhanced photocatalysis of MNZ: application to pharmaceutical wastewater treatment**

Noha I. Abdelaziz1*, Medhat A. Al-Ghobashy2, Marianne Nebsen2, Ahmed H. Nadim 2

1Department of Chemistry, School of Pharmacy, Newgiza University, Giza 12256, Egypt

2Analytical Chemistry Department, Faculty of Pharmacy, Cairo University, Cairo 11562, Egypt

*Correspondence:

Ahmed H. Nadim, Department of Analytical Chemistry, Faculty of Pharmacy, Cairo University, Cairo 11566, Egypt.

Email: [ahmed.nagib@cu.edu.eg](mailto:ahmed.nagib@cu.edu.eg)

**Supplementary materials**


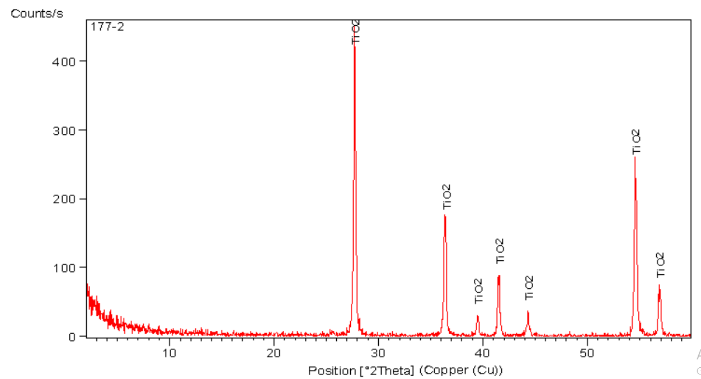

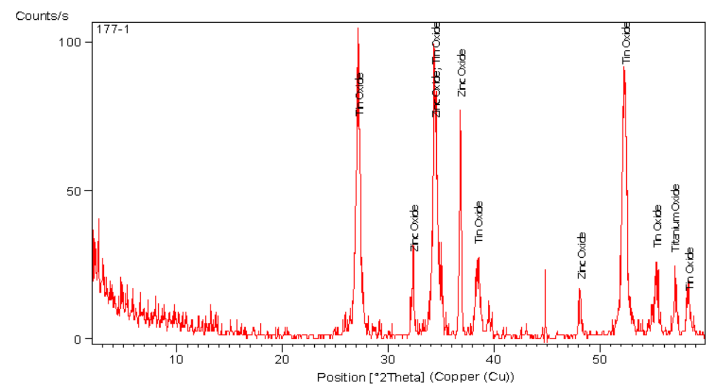


**b**

**a**

Figure 1: XRD Pattern of (a) commercially available pure TiO2 rutile and anatase nanoparticles, and (b) synthesized TiO2/ZnO/SnO2 ternary nanostructures.

Figure 2: XPS Spectra of TiO2/ZnO/SnO2 nanocomposites (a) the survey spectra (b) O 1s (c) Sn 3d (d) Ti 2p (e) Zn 2p


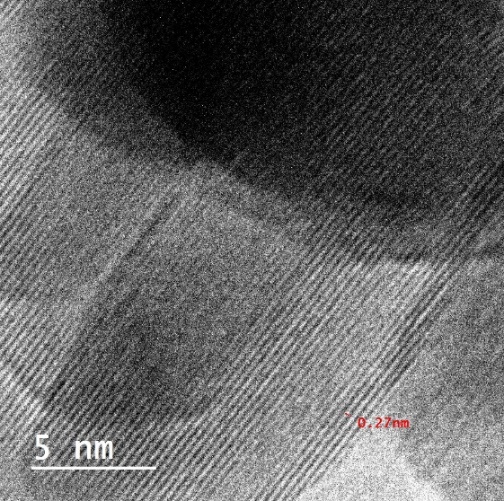

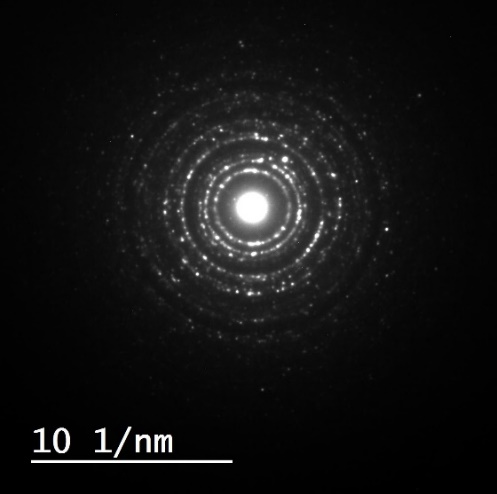


(g)

(h)

Figure 3: TEM image (a,b, and C) of TiO2 readymade nanoparticles and (b,c,d,e,f,g and h) of synthesized TiO2/ZnO/SnO2 at different levels.

Figure 4: SEM images (a, b and c) of the synthesized nanocomposite at different magnifications.

*Table 1. Summary of System Suitability and Validation Parameters for HPLC Analysis of Metronidazole*

| **System Suitability Parameters [[1]](#footnote-1)** |  |
| --- | --- |
| Retention time (min) | 3.82 |
| Theoretical plates (N) | 7650 |
| Tailing factor (T) | 1.12 |
| Capacity factor (k′) | 1.15 |
| Selectivity (α) | 1.28 |
| Resolution (Rs) | 4.87 |
| Height equivalent to theoretical plate (mm) | 0.032 |

| **Validation Parameters** |  |
| --- | --- |
| Linearity range (µg/mL) | 1 – 50 |
| Correlation coefficient (R²) | 0.9999 |
| Regression equation | y = 15.832x + 1.268 |
| LOD (µg/mL)[[2]](#footnote-2) | 0.14 |
| LOQ (µg/mL)[[3]](#footnote-3) | 0.42 |
| Accuracy (mean ± SD) | 99.85 ± 1.02 |
| Repeatability (intra-day RSD %)[[4]](#footnote-4) | 0.56 |
| Intermediate precision (inter-day RSD %)[[5]](#footnote-5) | 1.75 |
| Robustness (% RSD)[[6]](#footnote-6) |  |
| Asymmetric factor (T) | 0.55 |
| Capacity factor (k′) | 1.15 |

Figure 5: (a) HPLC chromatogram of the recovered MNZ using the method stated (b) HPLC chromatogram of the degraded MNZ showing the elution of its degradation products at lower retention time.


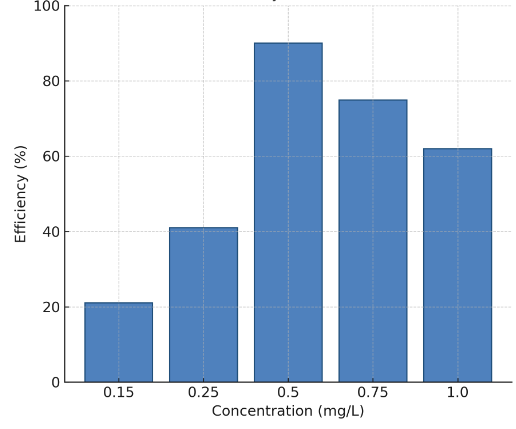


Figure 6. The effect on initial photocatalyst concentration on the degradation of MNZ, showing an optimum activity at 0.5mg/L


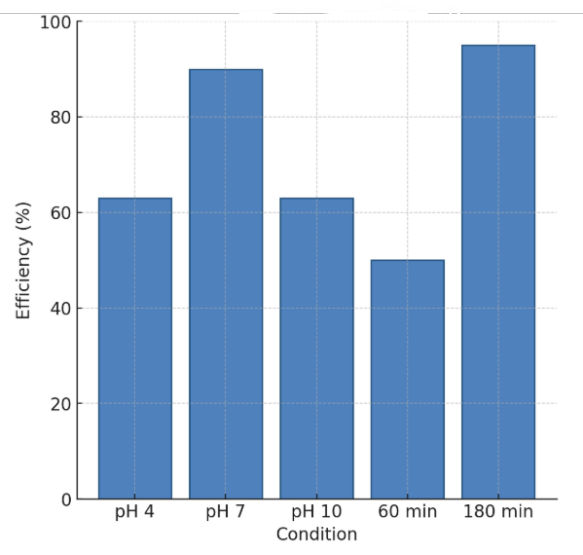


Figure 7. Effect of pH and time on MNZ photocatalytic degradation showing neutral pH 7 at time 120 minutes to be of optimal activity and expected the 180 minutes has improved degradation


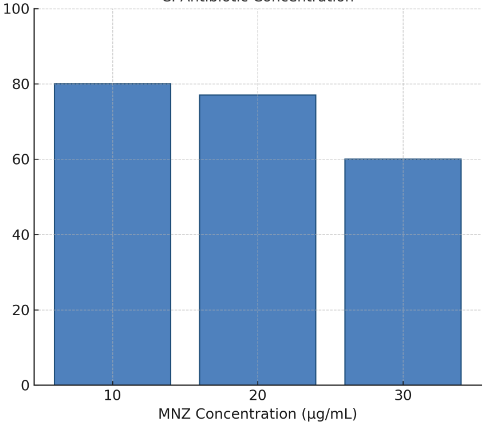


Figure 8. The effect of initial MNZ concentration on the efficiency of the photocatalytic degradation


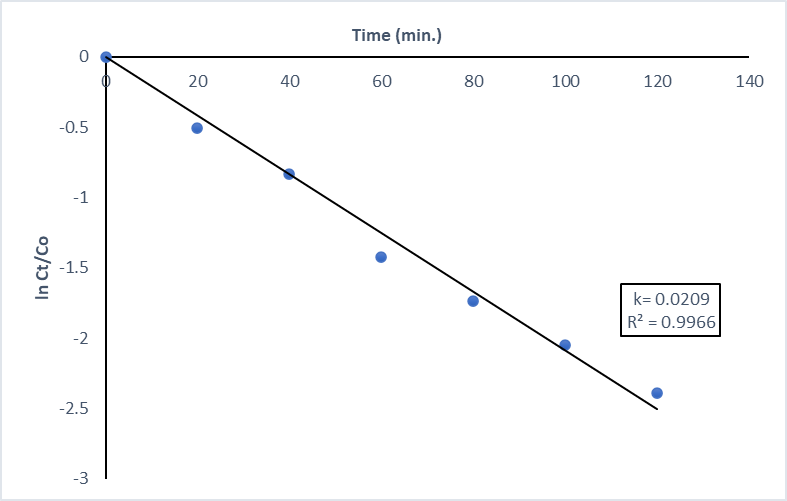


*t1/2* = 36.1 minutes

Figure 9: Kinetic profile of the photodegradation of 250 µg/mL initial MNZ concentration at pH 7 with 0.5 mg/mL of ZnO/SnO2/TiO2 nanocatalyst

1. Reference values for HPLC parameters: k′ ≥ 1, α ≥ 1, Rs ≥ 1.5, T ≤ 2 and N ≥ 2000 [↑](#footnote-ref-1)
2. LOD determined by the formula 3.3 × (SD of the response/slope) [↑](#footnote-ref-2)
3. LOQ determined by the formula 10 × (SD of the response/slope) [↑](#footnote-ref-3)
4. Mean of nine determinations over three concentration levels [↑](#footnote-ref-4)
5. Average of nine determinations with deliberate method parameter variations [↑](#footnote-ref-5)
6. Studied factors: wavelength (±2 nm), flow rate (±0.1 mL/min), and mobile phase pH (±1%) [↑](#footnote-ref-6)
